# Supplementary material for: hoxc12/c13 as key regulators for rebooting the developmental program in Xenopus limb regeneration
Source: PubMed Central journal article supplement (PMC11035627; doi:10.1038/s41467-024-47093-y), 2024-04-22
Supplement: 41467_2024_47093_MOESM1_ESM.pdf [file 41467_2024_47093_MOESM1_ESM.pdf]

## Supplementary Information for

### ***hoxc12/c13* as key regulators for rebooting the developmental program in *Xenopus* limb regeneration**

Aiko Kawasumi-Kita, Sangwoo Lee, Daisuke Ohtsuka, Kaori Niimi, Yoshifumi Asakura, Keiichi Kitajima, Yuto Sakane, Koji Tamura, Haruki Ochi, Ken-ichi T Suzuki, and Yoshihiro Morishita\*

\*Corresponding author. Email: [yoshihiro.morishita@riken.jp](mailto:yoshihiro.morishita@riken.jp)

#### **This PDF file includes:**

Supplementary Figures 1 to 16

Supplementary Table 1

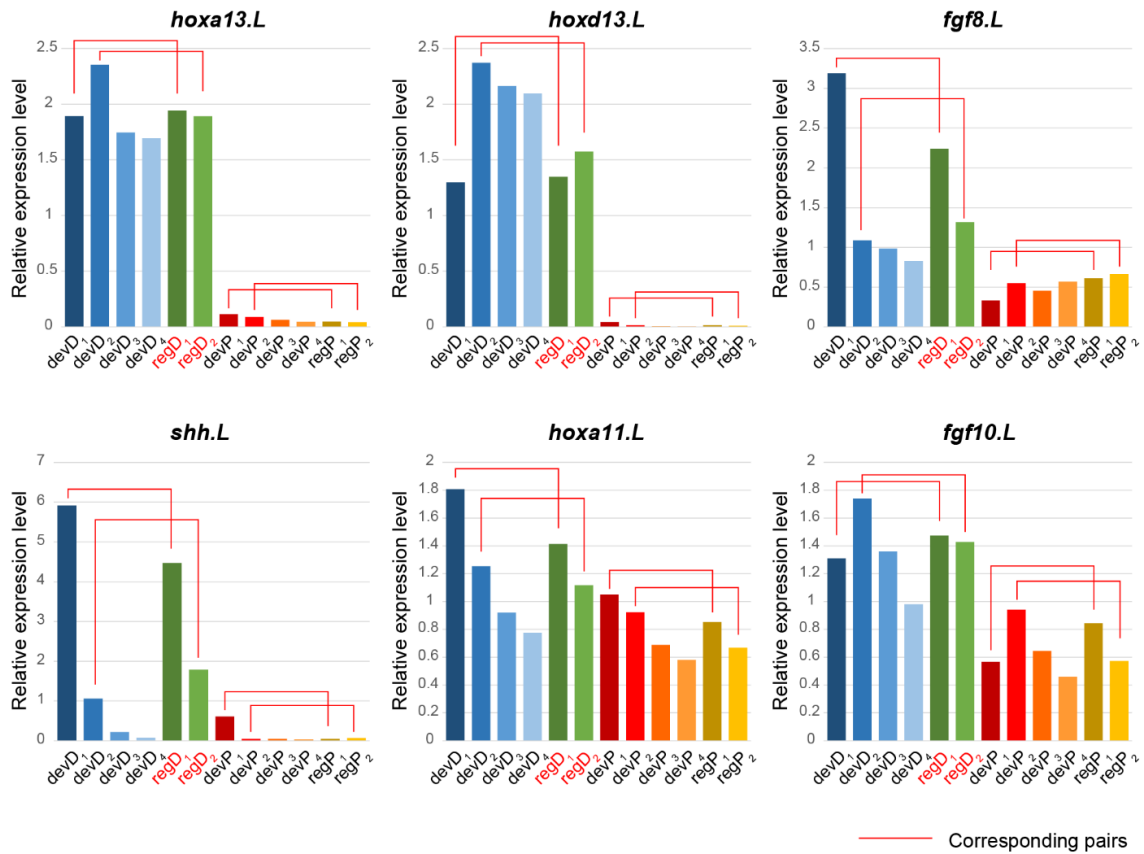

**Fig. S1. Results of transcriptomic analysis for typical patterning genes essential for normal limb development**

Relative expression levels of the patterning genes are comparable for each corresponding pair (the means of triplicate data). Source data are provided as a Source Data file.

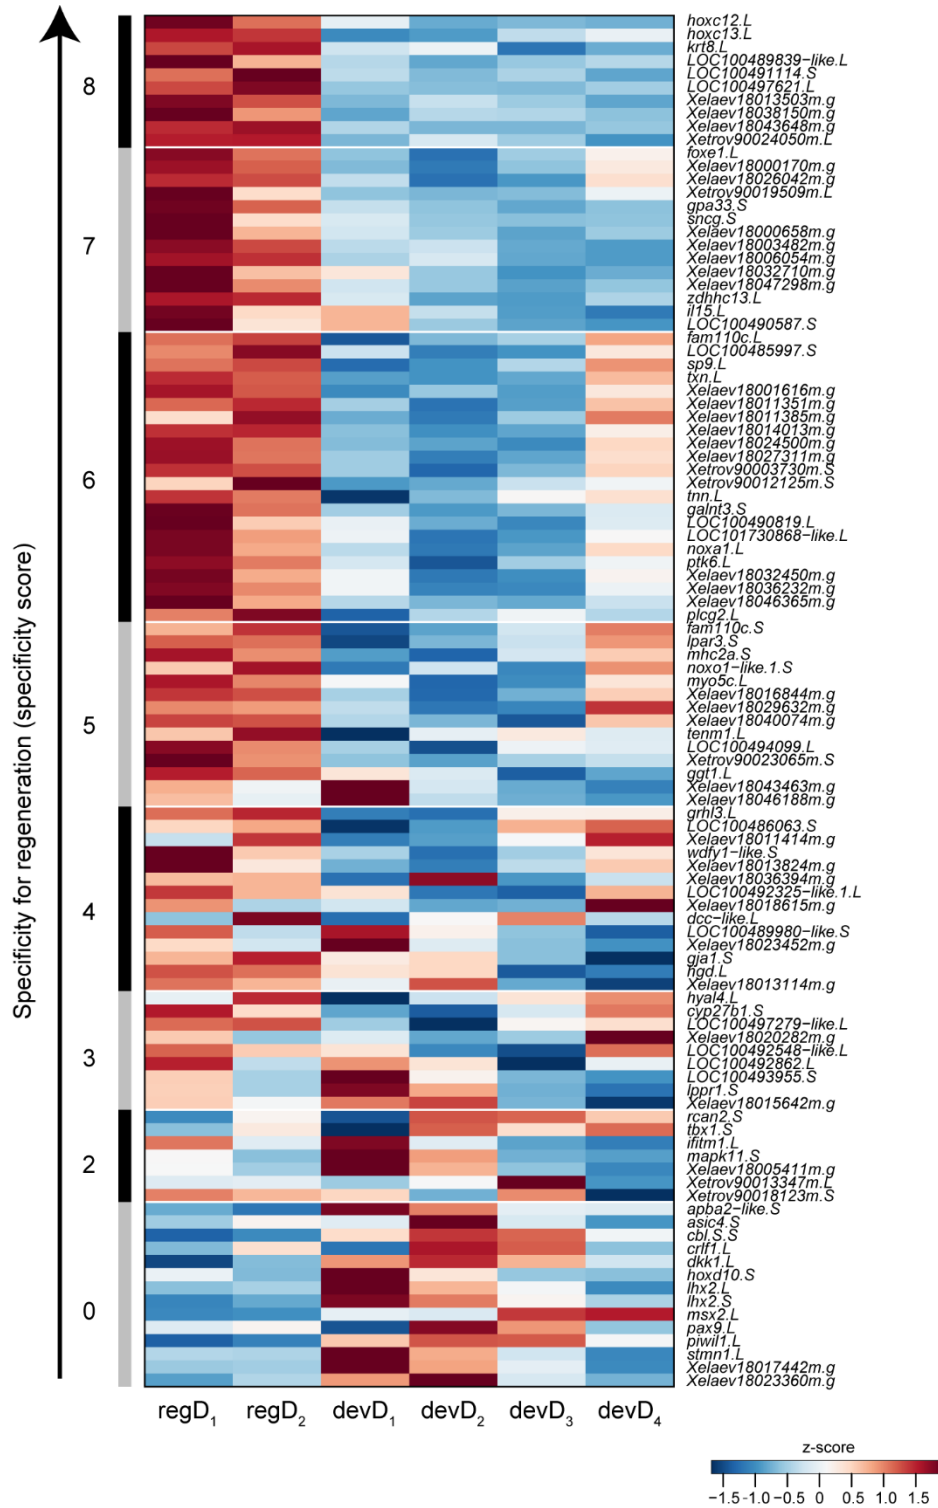

**Fig. S2. List of genes remaining after the second screen in the transcriptomic analysis**

The genes remaining after the second screen are arranged in order of their specificity scores (see also Figs. 1e-f).

*Xenopus laevis*

**A** Development

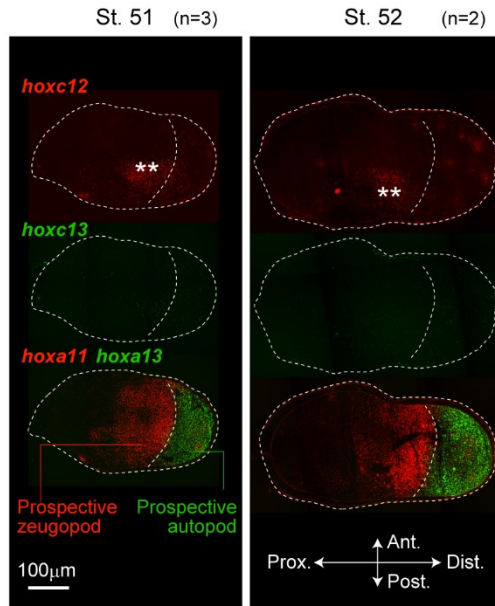

**B** Regeneration (larva)

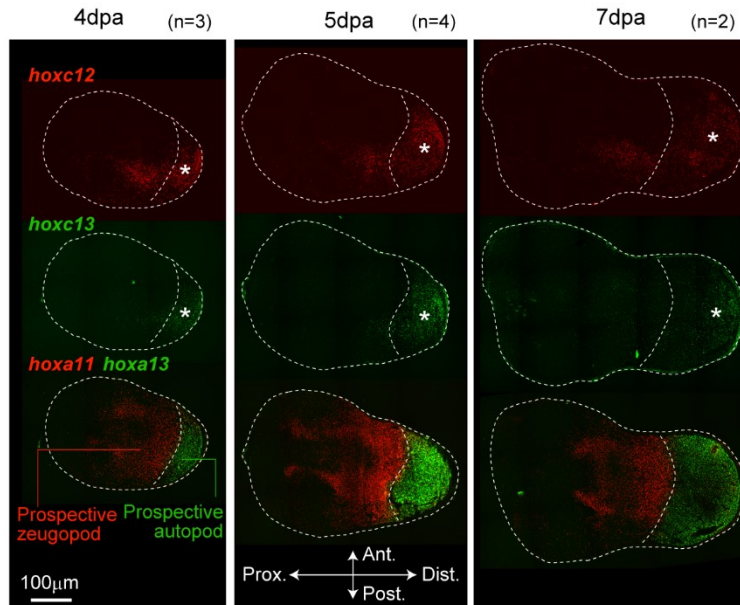

**Fig. S3. *hoxc12/c13* expression patterns during limb development and regeneration**

(A) *hoxc12/c13* expression patterns in the developing limb buds at St. 51 and 52, and (B) in the larval regenerating limb blastema at 4, 5, and 7 dpa. Each experiment was independently repeated for each gene with similar results.

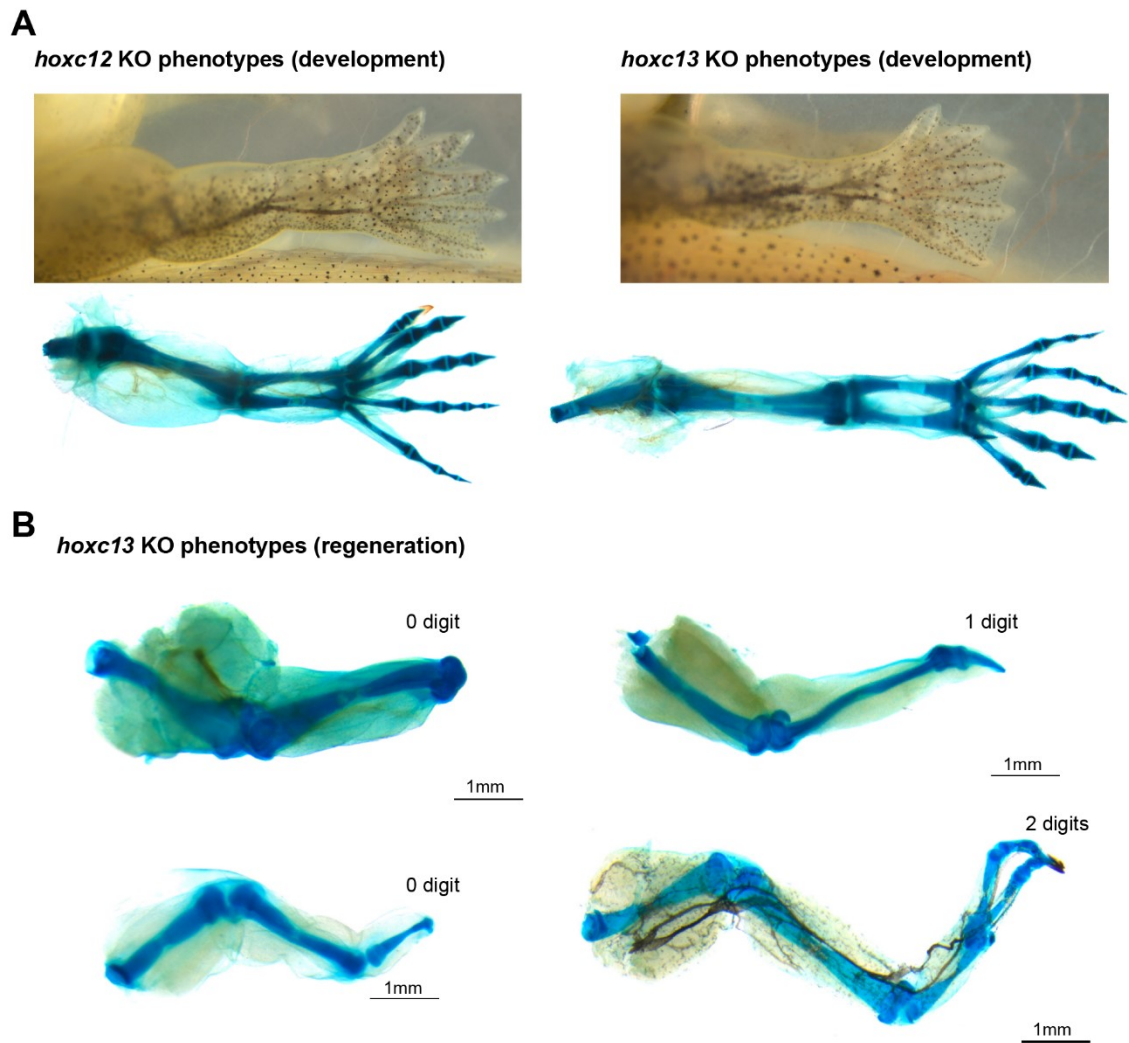

**Fig. S4. Effects of *hoxc12/c13* knockout on larval limb development and regeneration**  
 Examples of limb morphologies/cartilage patterns in development (**A**) and in regeneration (**B**).  
 Cartilage was stained with Alcian blue. *hoxc12*-KO: *hoxc12*<sup>-/-</sup>; *hoxc13*-KO: *hoxc13*<sup>-/-</sup>.

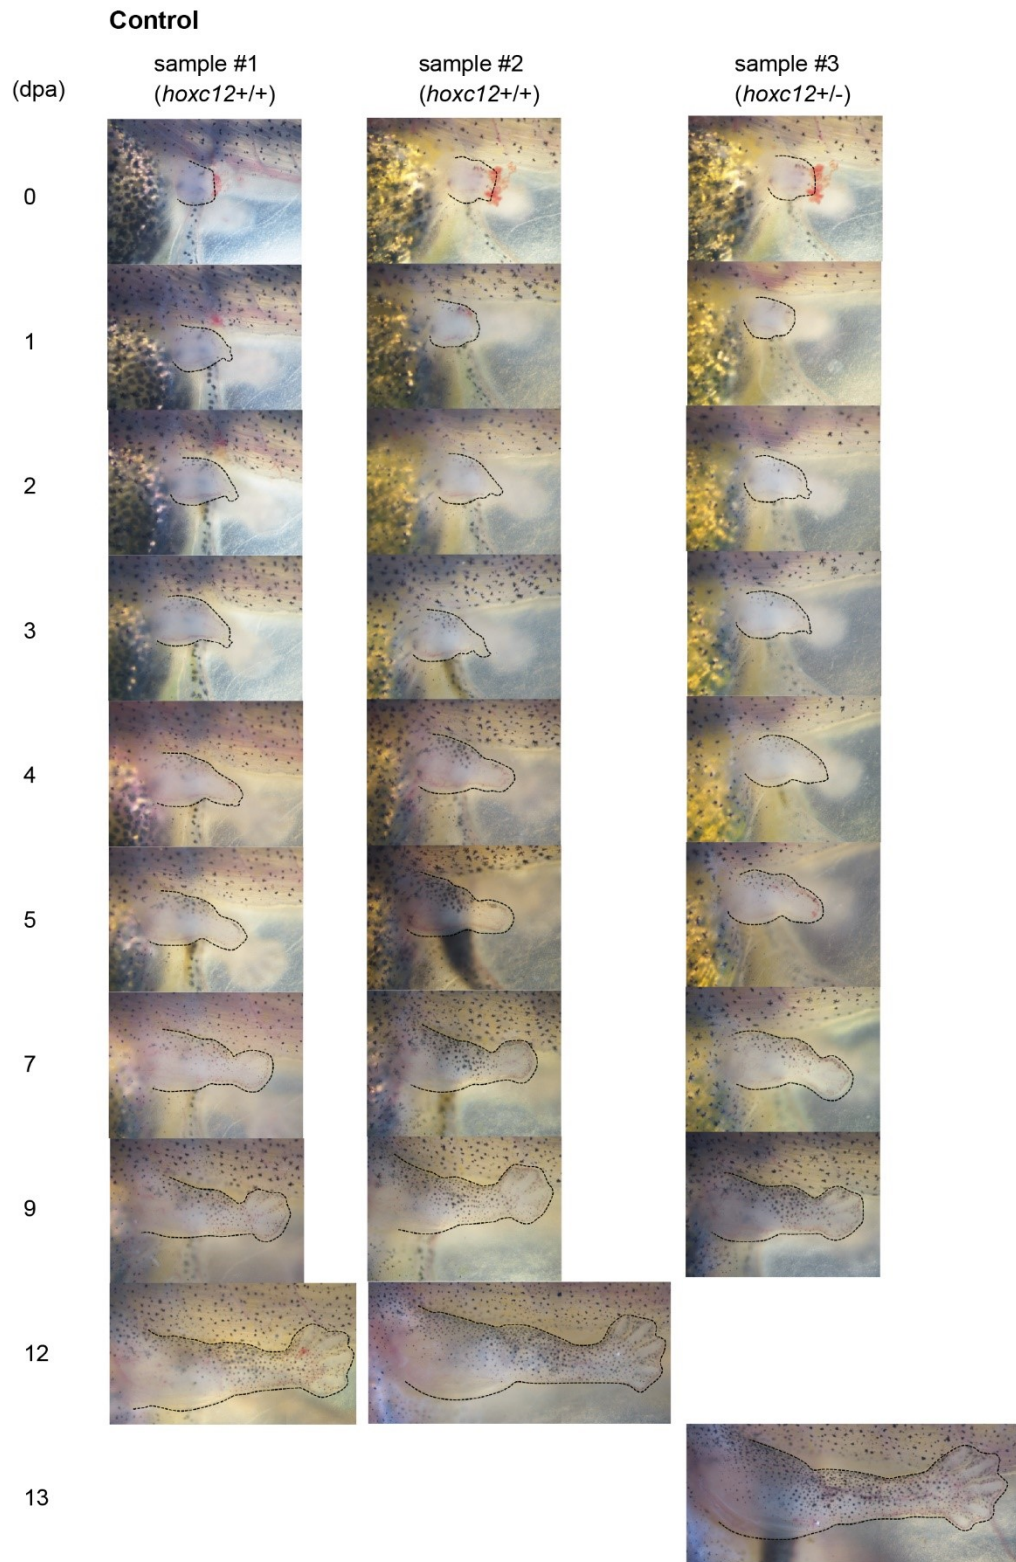

**Fig. S5. Time course of regenerating limb blastema in wild type individuals**

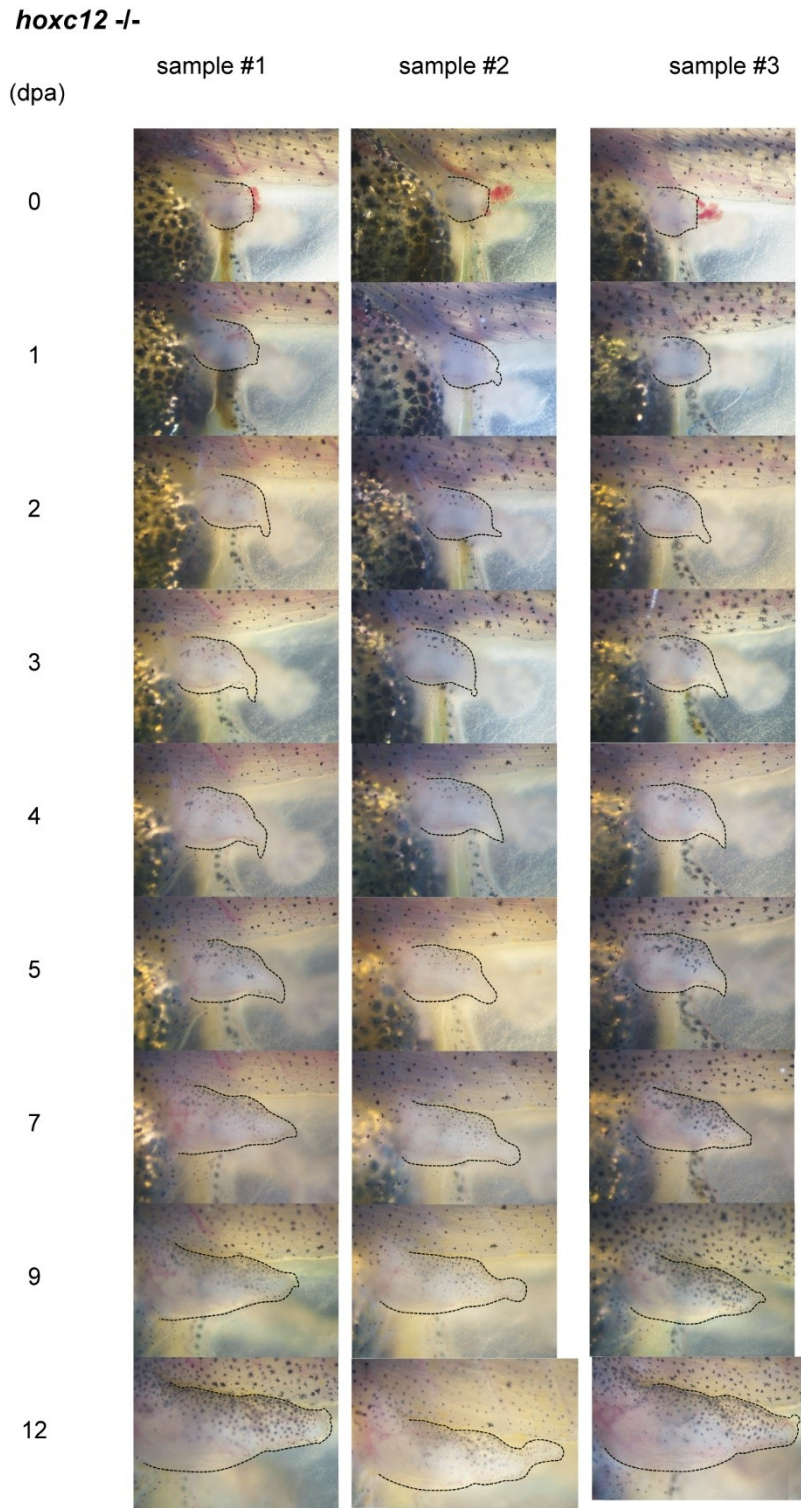

**Fig. S6. Time course of regenerating limb blastema in *hoxc12*<sup>-/-</sup> individuals**

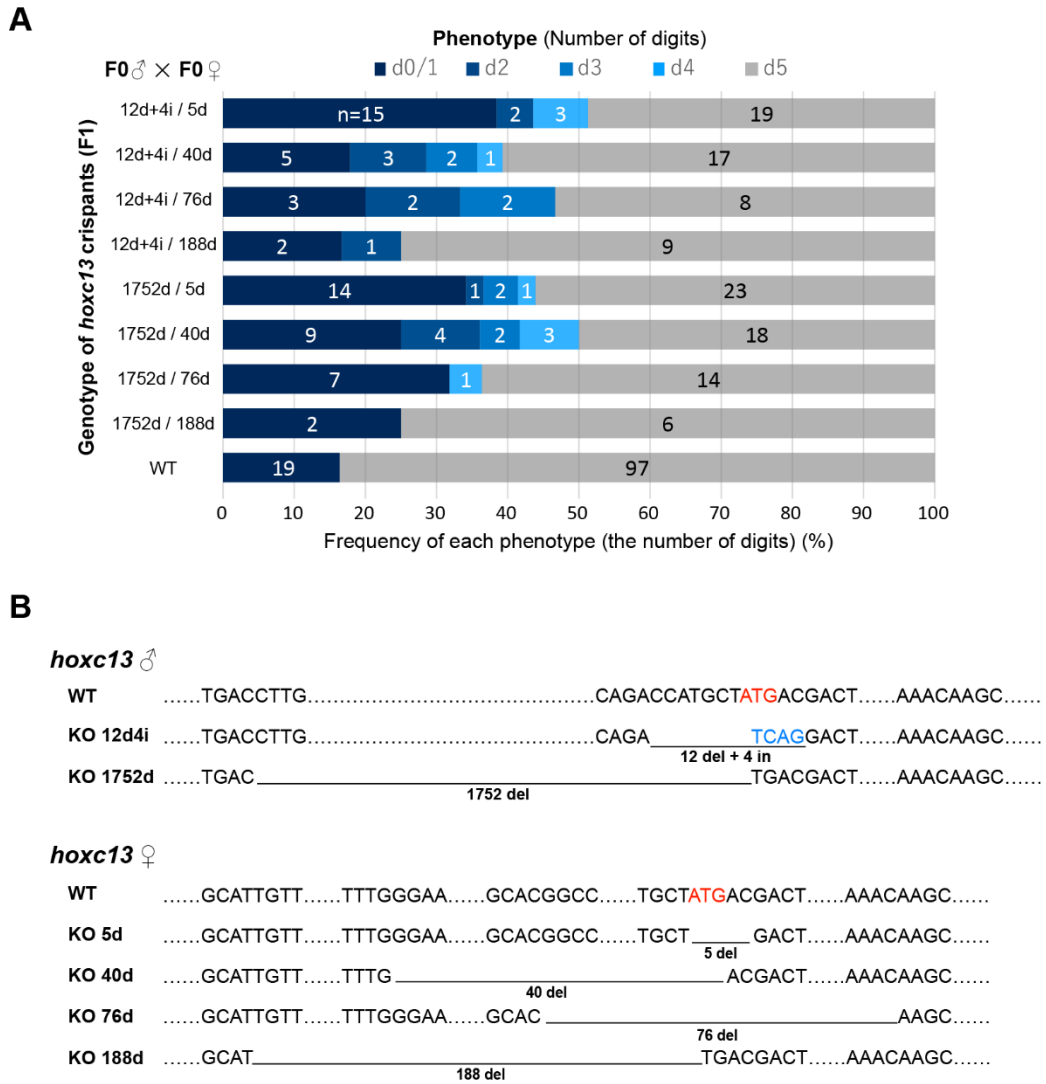

**Fig. S7. Effects of *hoxc13* knockout by genome editing in larval limb regeneration**

(A) Frequency distribution of phenotypes defined by the number of digits for individuals with deletions or insertions of different sub-sequences by genome editing. (B) Information about the deletion or insertion of sub-sequences for each parent.



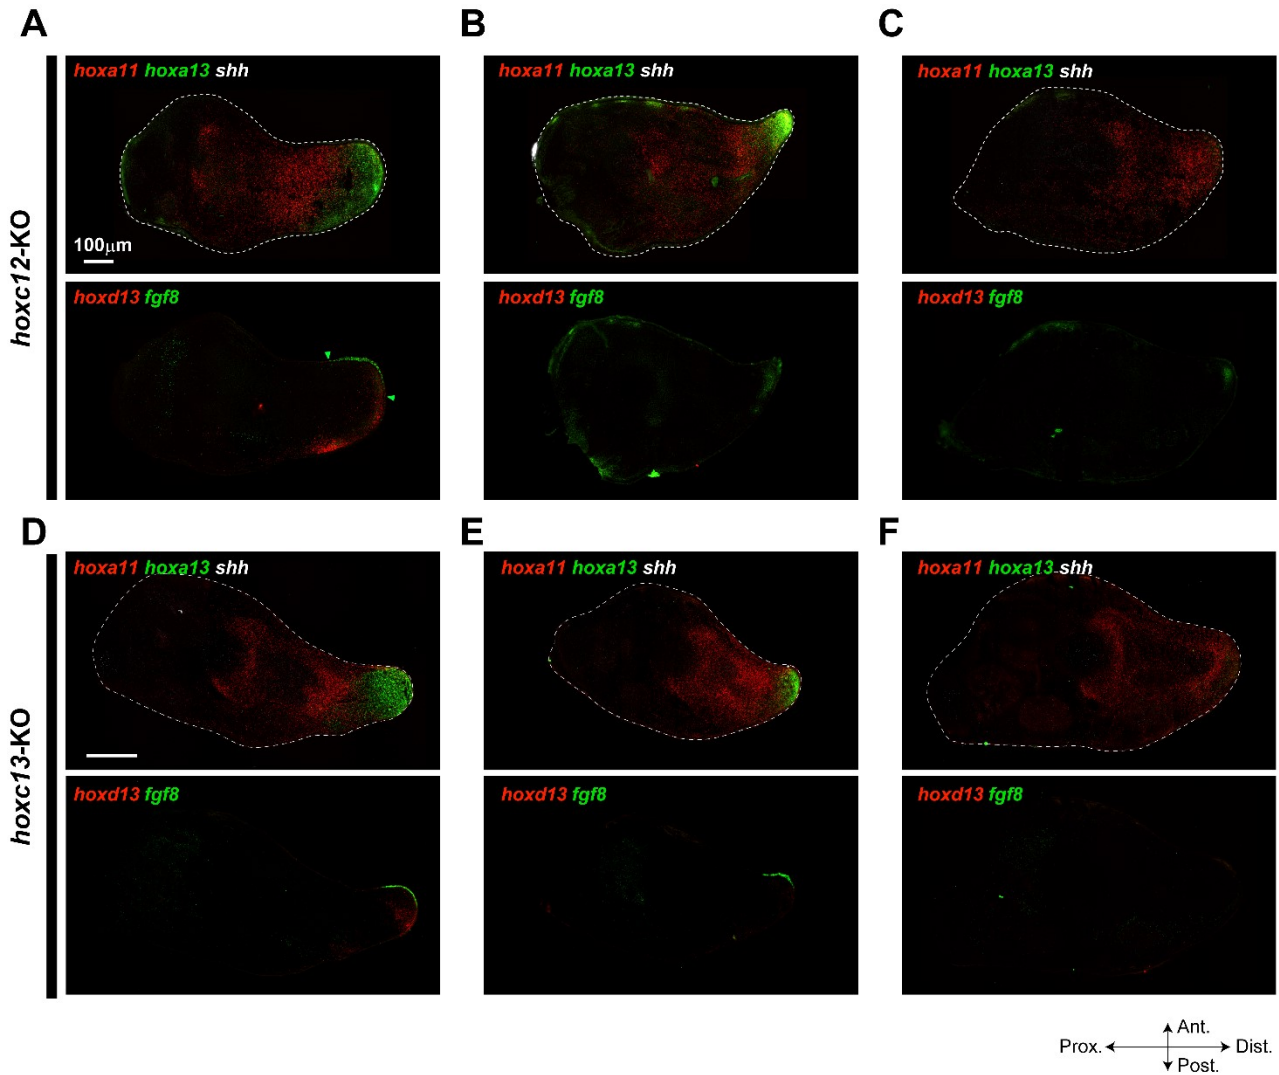

**Fig. S8. RNAscope results for patterning genes (6 examples in addition to those shown in Fig.3a)**

(A, D) Mild morphological defects. *hoxa11* and *hoxa13* were exclusively expressed along the PD axis. *shh* expression was not detected. *fgf8* expression was observed in the anterior half of the distal epithelium. The expression range of *hoxd13* was smaller than during normal development (Fig. 3a). (B, E) Blastema growth was severely reduced. *hoxa13* was expressed at the distalmost region, but no exclusive expression with *hoxa11* was observed. *shh*, *hoxd13* expression was almost undetectable. *fgf8* expression was almost undetectable in (B) and was observed in the anterior half of the distal epithelium in (E). (C, F) Blastema growth was also severely reduced. Expression of genes other than *hoxa11* was almost undetectable.

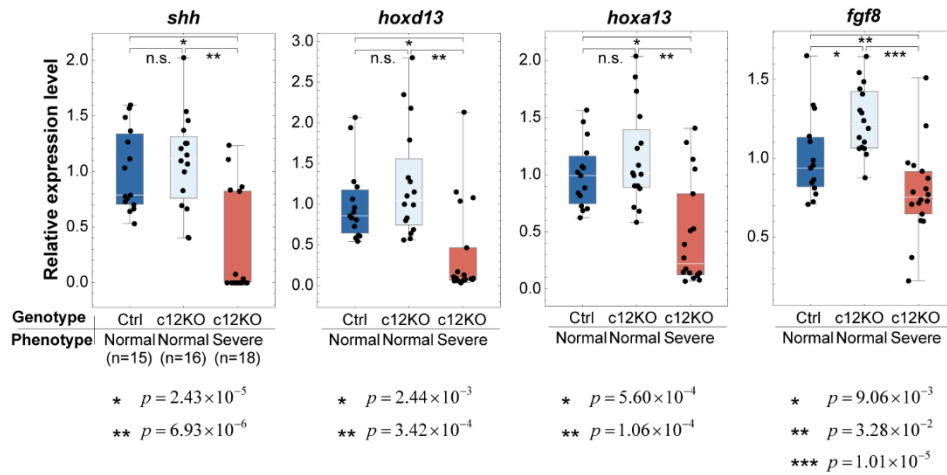

**Fig. S9. Result of qPCR assay for some patterning genes.** Comparisons were made among control (*hoxc12*<sup>+/-</sup>, with normal phenotype) and *hoxc12*-KO (with normal or severe phenotype). Box-plot elements: center line, median; box limits, upper and lower quartiles; whiskers, max/min. Statistical test (Student's t-test, two-sided). Source data are provided as a Source Data file.

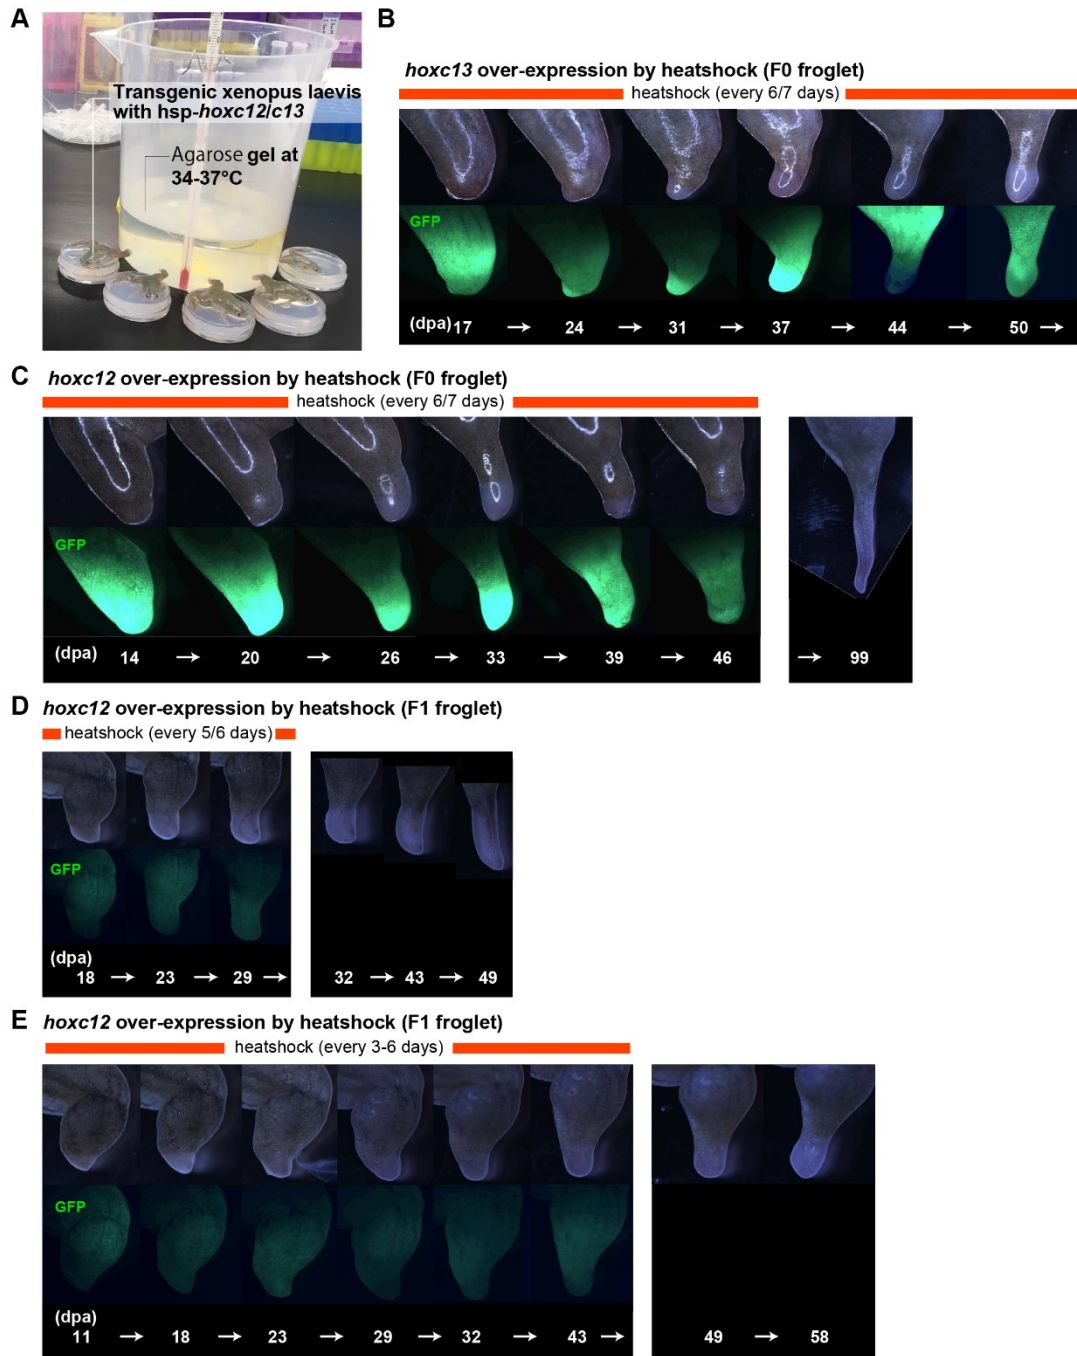

**Fig. S10. Heat-shock induction of *hoxc12* or *c13* expression and phenotypes**

(A) Photo showing the experimental set up for the heat-shock induction of *hoxc12* or *hoxc13* expression by embedding amputated hindlimbs in agarose gel at 34-37°C (see Methods). (B-E) Morphological changes in blastema with *hoxc12* or *hoxc13* overexpression induced by heat-shock at varying durations (4 examples in addition to that shown in Fig. 4b). It should be noted that the induced GFP level by heat-shock in F1 individuals are weaker than that in F0, but still stronger than that by amputation stress only, for which microscopic detection was difficult.

**A**

*hoxc12* induction by amputation stress

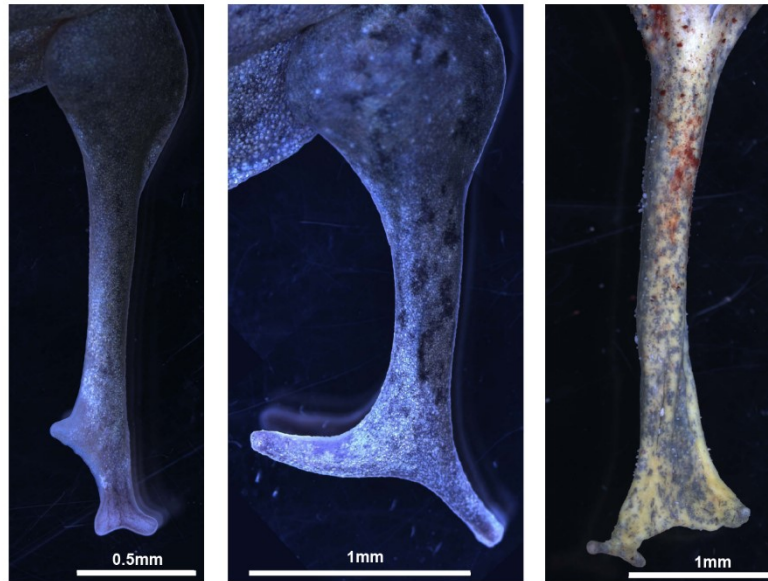

**B**

*hoxc13* induction by amputation stress

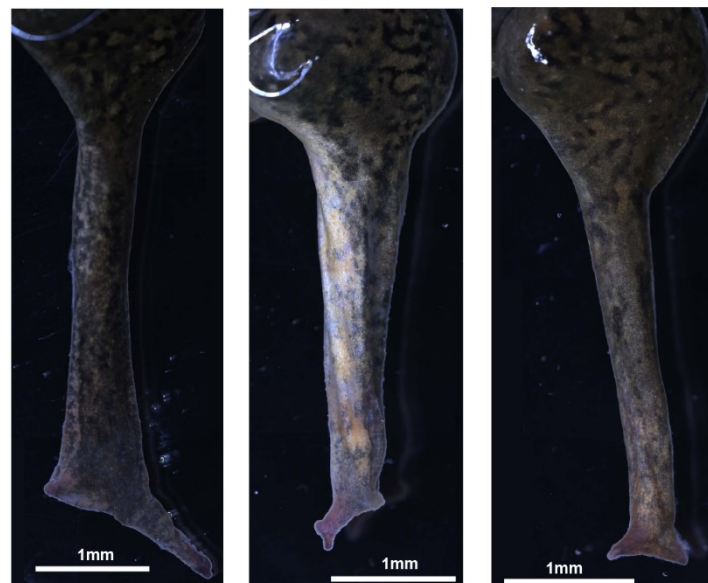

**Fig. S11. Regenerated limbs with multifurcated distal cartilage**

Phenotypes generated by (A) *hoxc12* or (B) *hoxc13* induction by amputation stress (without heat-shock).

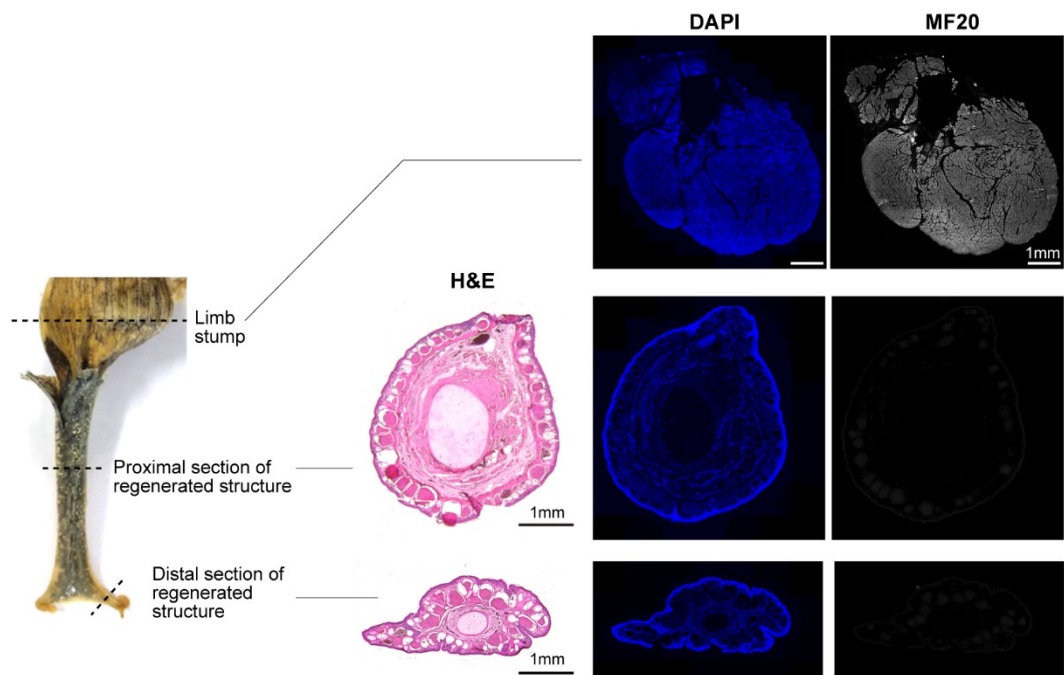

**Fig. S12. Muscle staining using MF20.** No muscle was observed within the regenerated limb structures of Tg individuals.

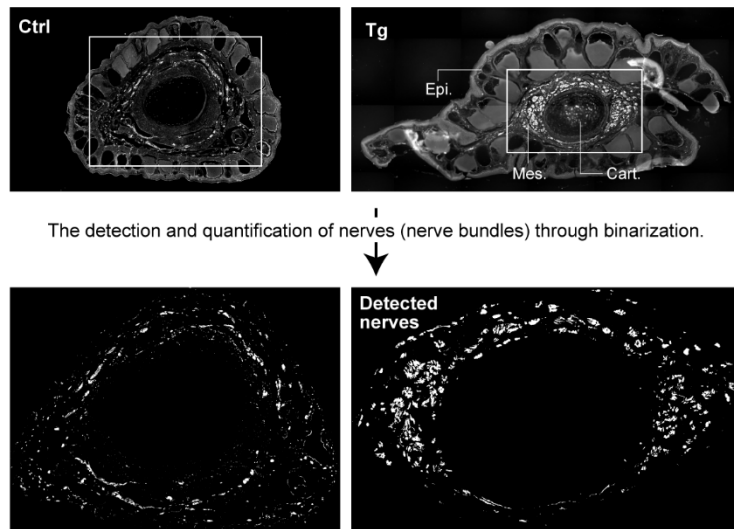

**Fig. S13. Image analysis for detecting nerves (acetylated tubulin signal).**

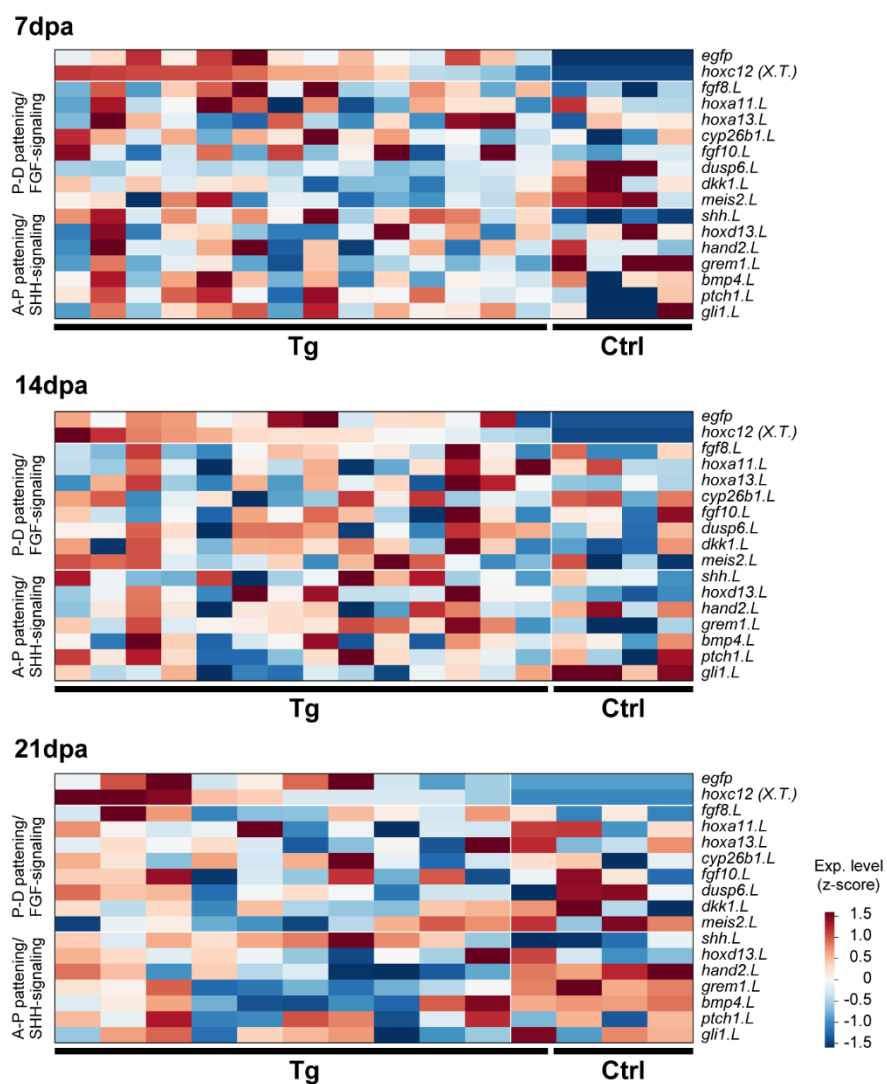

**Fig. S14. Comparative analysis of transcriptome data (froglet regeneration at 7, 14, 21 dpa) for typical patterning genes that function during limb development**

Source data are provided as a Source Data file.

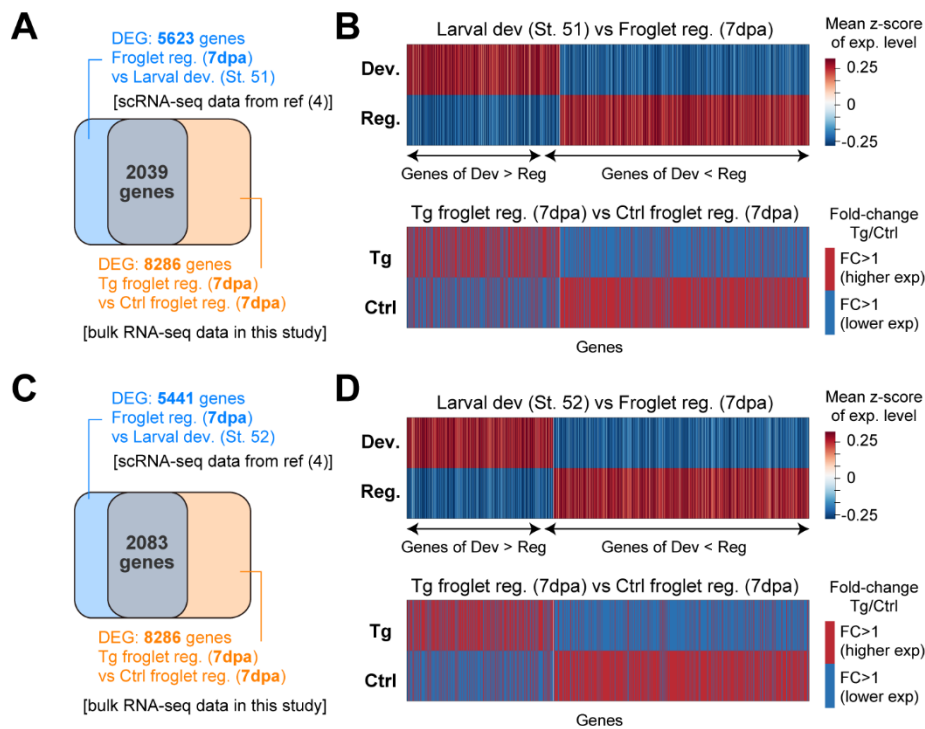

**Fig. S15. Comparative transcriptome analysis.** (A, C) Extraction of differentially expressed genes (DEGs) between developing limb buds (A: St. 51; C: St.52) and froglet blastema (7dpa) based on single cell transcriptome data from Lin et al (2021) ( $DEG_{bl-dev}$ ), and DEGs between *hoxc12*Tg/control froglet blastema (7dpa) based on bulk-transcriptome data obtained in this study ( $DEG_{Tg}$ ). (B, D) Comparison of expression levels for genes that are common in both  $DEG_{bl-dev}$  and  $DEG_{Tg}$ , which are identified in A and C, respectively; (top) developing limb bud vs froglet blastema and (bottom) Tg vs control froglet blastema. Source data are provided as a Source Data file.



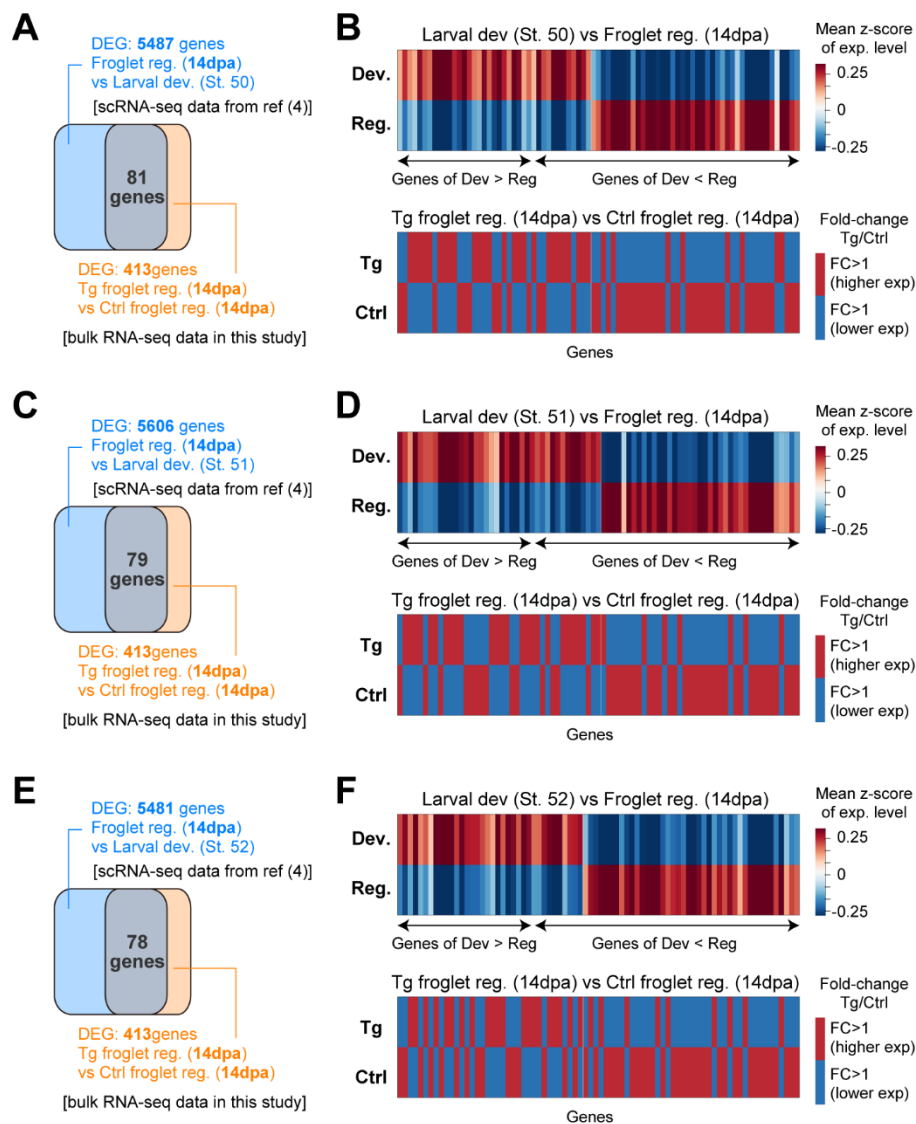

**Fig. S16. Comparative transcriptome analysis.** (A, C, E) Extraction of differentially expressed genes (DEGs) between developing limb buds (A: St. 50; C: St. 51, E: St. 52) and froglet blastema (14dpa) based on single cell transcriptome data from Lin et al (2021) ( $DEG_{bl-dev}$ ), and DEGs between *hoxc12*Tg/control froglet blastema (14dpa) based on bulk-transcriptome data obtained in this study ( $DEG_{Tg}$ ). (B, D, F) Comparison of expression levels for genes that are common in both  $DEG_{bl-dev}$  and  $DEG_{Tg}$ , which are identified in A, C, and E, respectively; (top) developing limb bud vs froglet blastema and (bottom) Tg vs control froglet blastema. Source data are provided as a Source Data file.

| <b>Gene</b>                                      | <b>Forward Primer Sequence</b> | <b>Reverse Primer Sequence</b> | <b>Reporter 1 Sequence</b> |
|--------------------------------------------------|--------------------------------|--------------------------------|----------------------------|
| <b><i>hoxa11</i></b><br><b>(<i>X.trop</i>)</b>   | CGGCAACAATGAGGACAAAGC          | CTGGTATTTGGTATAAGGGCACCTT      | CTGCCCACTGCTGCTG           |
| <b><i>hoxa13</i></b><br><b>(<i>X.trop</i>)</b>   | CAACCCACCTCTGGAAATCGT          | CGAGCTGCTGTCTGACTGATG          | CCTGCCGGATGTCGTG           |
| <b><i>hoxc12.L</i></b><br><b>(<i>X.laev</i>)</b> | CCGACTAATCAAGGCAACAACAGT       | TCGGGACCTTGTGTGAATTGG          | AAGGAGCCCCACTGGCA          |
| <b><i>hoxc13.L</i></b><br><b>(<i>X.laev</i>)</b> | CGGTCACTTATGGAAAGCACCTT        | CCCCTGCGGTAGTTGCT              | CCCAGATGTGGTCCCC           |
| <b><i>hoxd13</i></b><br><b>(<i>X.trop</i>)</b>   | CAAGCCCCACACTTCTGGAA           | ACATGTCCGCCTGGTTTAGC           | CCTTCCCAGGAGATGTAG         |
| <b><i>fgf8</i></b><br><b>(<i>X.trop</i>)</b>     | GATTAACGCCATGGCAGAAGAC         | AACTCTGCTTCCAAACGTATCTGTT      | ACCCACATGCCAAGTTA          |
| <b><i>Shh.L</i></b><br><b>(<i>X.laev</i>)</b>    | CGAGTCCAAAGCTCATATTCAGTGT      | AGCACCCGCCAGACTTG              | ACTGAGTTCTCTGCTTTGAC       |

**Supplementary Table 1:** The primers and fluorogenic probes for all genes in real-time PCR analysis.
