# Supplementary material for: hoxc12/c13 as key regulators for rebooting the developmental program in Xenopus limb regeneration
Source: PubMed Central journal article supplement (PMC11035627; doi:10.1038/s41467-024-47093-y), 2024-04-22
Supplement: 41467_2024_47093_MOESM3_ESM.pdf [file 41467_2024_47093_MOESM3_ESM.pdf]

## **Description of Additional Supplementary Files**

### **Supplementary Data1:**

Gene Ontology annotations for the 104 genes (shown in Fig. 1f) selected through transcriptome analysis.

### **Supplementary Movie1:**

An example of regenerated structure after hindlimb amputation in *hoxc12* transgenic *Xenopus laevis*, with trifurcation of cartilage at the distal tip.
